# Supplementary material for: Mixed Matrix Membranes for Efficient CO2 Separation Using an Engineered UiO-66 MOF in a Pebax Polymer
Source: MDPI journal article supplement (doi:10.3390/polym14040655), 2022-02-09
Supplement: s1 [file s1]

**Supporting Information for**

# Mixed Matrix Membranes for Efficient CO<sub>2</sub> Separation Using an Engineered UiO-66 MOF in a Pebax Polymer

Asmaul Husna <sup>1,2,\*</sup>, Iqbal Hossain <sup>1,2,\*</sup>, Insu Jeong <sup>1,2</sup> and Tae-Hyun Kim <sup>2,\*</sup>

<sup>1</sup> Organic Material Synthesis Laboratory, Department of Chemistry, Incheon National University, Incheon 22012, Korea

<sup>2</sup> Research Institute of Basic Sciences, Incheon National University, Incheon 22012, Korea

\* iqbal.chem.ru.08@gmail.com (I.H.); tkim@inu.ac.kr (T.-H.K.)

**This file includes:**

Characterization and measurement

Scheme S1

Figures S1–S8

Tables S1–S4

## **S1. Characterization and Measurements**

<sup>1</sup>H NMR spectra were collected with an Agilent 400-MR (400 MHz) instrument using CDCl<sub>3</sub> and D<sub>2</sub>O as the solvents and TMS as a reference or internal deuterium lock. ATR-FTIR spectra were recorded on a PerkinElmer FTIR Spectrum Two.

Membrane thickness was determined with a micrometer (Mitutoyo Model 547-201, Japan).

Thermogravimetric analysis (TGA) was conducted on a Scinco TGA/N-1000 analyzer at a heating rate of 10 °C min<sup>-1</sup> under a nitrogen flow to determine the thermal properties of the samples.

Wide-angle X-ray diffraction (WAXD) spectra of the dry membranes were collected using a Rigaku HR-XRD Smart Lab diffractometer at a scanning rate of  $0.2^{\circ} \text{ min}^{-1}$  in a  $2\theta$  range from  $5^{\circ}$  to  $50^{\circ}$  with a Cu-K $\alpha$  X-ray source ( $\lambda = 1.54 \text{ \AA}$ ). The dried membranes were placed under vacuum at  $80^{\circ} \text{C}$  for 12 h and were equilibrated at 50% RH at least 24 h prior to the measurement.

Field emission scanning electron microscopy (FE-SEM) was performed to investigate the surface and cross-sectional morphologies of the membranes and the distribution and size of the fillers embedded into the polymer matrix. Moreover, to obtain the cross-sectional morphology, the membranes were first fractured in liquid nitrogen and then coated with gold. All membranes have a thickness between 50 and 60  $\mu\text{m}$ .

Atomic force microscopy (AFM) was performed using a Bruker Multi-Mode instrument in a Tapping mode. A silicone cantilever with an end radius  $< 10 \text{ nm}$  and a force constant of  $40 \text{ N m}^{-1}$  (NCHR, nanosensors,  $f = 300 \text{ kHz}$ ) was used to image the samples at ambient temperature. The samples were equilibrated with 50% RH at least 24 h prior to the imaging. The measurements were conducted under the same conditions for each sample to keep consistency.

Nitrogen adsorption experiments were conducted at  $77 \text{ K}$  using a Micromeritics ASAP 2020 HD88. All the samples were degassed under a vacuum at  $150^{\circ} \text{C}$  for 10 h prior to the analysis. The surface areas were calculated from a multipoint BET plot. Nitrogen sorption isotherms were measured at  $77 \text{ K}$ . All samples were degassed at  $150^{\circ} \text{C}$  for 2 h under a vacuum before being testing.

Tensile properties were measured on a Shimadzu EZ-TEST E2-L instrument benchtop tensile tester using a crosshead speed of  $1 \text{ mm min}^{-1}$  at  $25^{\circ} \text{C}$  under 50% relative humidity. The membranes have a thickness between 50 and  $60 \mu\text{m}$ . Engineering stress was calculated from the initial cross sectional area of the sample and Young's modulus ( $E$ ) was determined from the initial slope of the stress–strain curve. The membrane samples were cut into a rectangular shape with  $40 \text{ mm} \times 10 \text{ mm}$  (total) and  $20 \text{ mm} \times 10 \text{ mm}$  (test area)

## S2. Gas Permeation Measurements

Permeation measurements of pure gases were taken using a high-vacuum time-lag measurement unit based on a constant-volume/variable-pressure method. All experiments were performed at a feed pressure of 1 bar (except for the plasticization experiments, which were carried out at 1–20 bar feed pressures) and a feed temperature of 30 °C. Before taking these measurements, to remove any residual gases, both the feed and the permeate sides were thoroughly evacuated to below  $10^{-5}$  Torr ( $1.33 \times 10^{-8}$  bar) until the readout showed zero. The downstream volume was calibrated using a Kapton membrane and was found to be 57 cm<sup>3</sup>. The upstream and downstream pressures were measured using a Baraton transducer (MKS; Model No. 626B02TBE) with full scales of 10,000 and 2 Torr (13.3 and  $2.7 \times 10^{-3}$  bar), respectively. The pressure on the permeate side was recorded as a function of time using a pressure transducer and recorded by a desktop computer through a shielded data cable. The permeability coefficient was determined from the linear slope of the downstream pressure versus time plot ( $dp/dt$ ) according to the following equation:

$$P = \frac{273}{76} \times \frac{V_1}{AT\rho_o} \times \frac{dp}{dt} \quad (1)$$

where  $P$  is the permeability expressed in Barrer (1 Barrer =  $10^{-10}$  [cm<sup>3</sup> (STP) cm cm<sup>-2</sup> s<sup>-1</sup> cm Hg<sup>-1</sup>],  $V$  (cm<sup>3</sup>) is the downstream volume,  $l$  (cm) is the membrane thickness,  $A$  (cm<sup>2</sup>) is the effective area of the membrane,  $T$  (K) is the measurement temperature,  $p_o$  (Torr) is the pressure of the feed gas in the upstream chamber, and  $dp/dt$  is the rate of the pressure change at a steady state. For each gas, the permeation tests were repeated a minimum of three times, and the standard deviation from the mean values of the permeabilities was within ~3%. The sample-to-sample reproducibility was high and within 3%. The effective membrane areas were 15.9 cm<sup>2</sup>.

The ideal perm-selectivity,  $\alpha_{A/B}$ , of the membrane for a pair of gases (A and B) is defined as the ratio of the individual gas permeability coefficients:

$$\alpha_{A/B} = \frac{P_A}{P_B} \quad (2)$$

The diffusivity and solubility were obtained from the time-lag ( $\theta$ ) value according to the following equations:

$$D = \frac{l^2}{6\theta} \quad (3)$$

$$S = \frac{P}{D} \quad (4)$$

where  $D$  ( $\text{cm}^2 \text{s}^{-1}$ ) is the diffusivity coefficient,  $l$  (cm) is the membrane thickness, and  $\theta$  (s) is the time lag, as obtained from the intercept of the linear steady-state part of the downstream pressure versus time plot. The solubility,  $S$ , was calculated from Equation (4) with the permeability and diffusivity obtained from Equations (1) and (3).

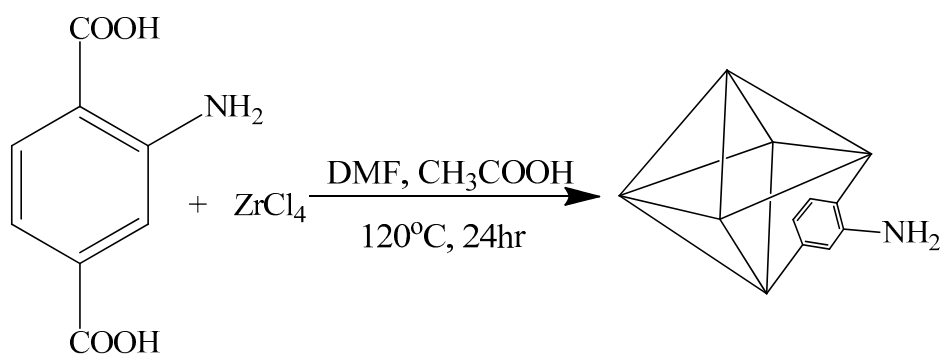

**Scheme S1:** Synthesis of UiO-66-NH<sub>2</sub>

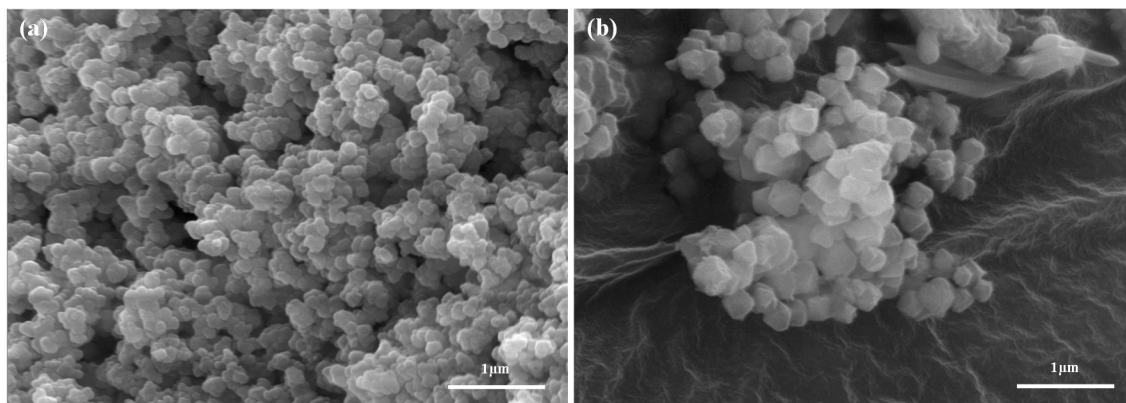

**Figure S1.** SEM images of (a) UiO-66-NH<sub>2</sub>, and (b) PIM-grafted-MOF (PIM-g-MOF)

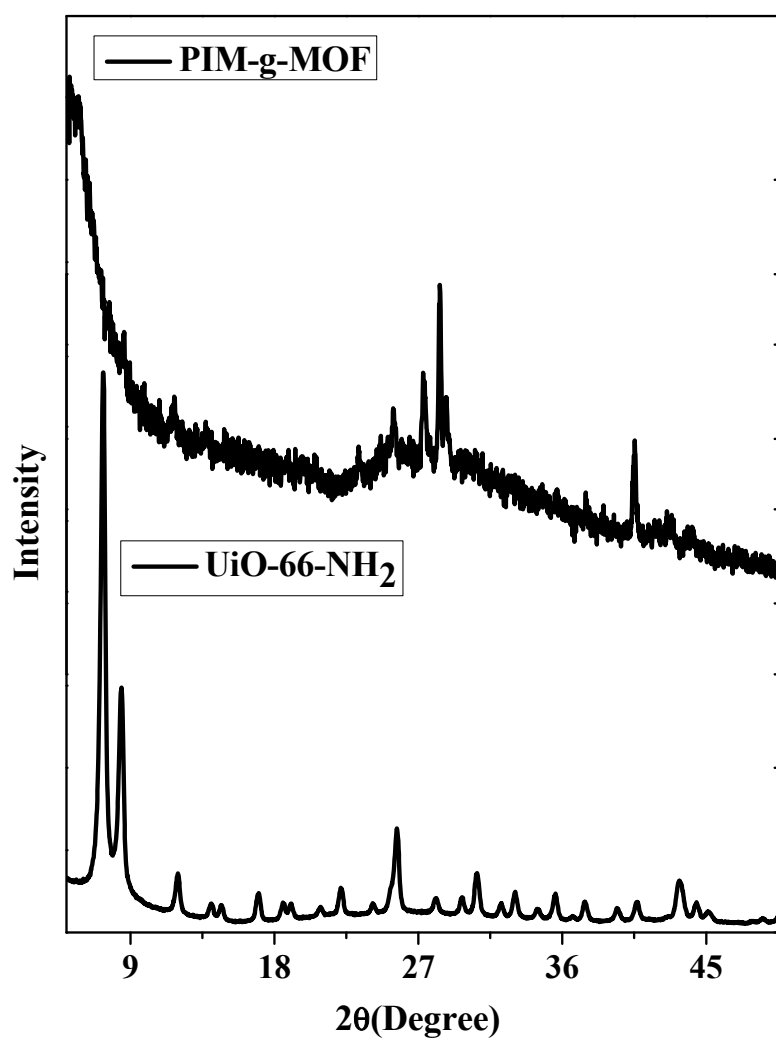

**Figure S2.** XRD spectra for UiO-66-NH<sub>2</sub> and PIM-g-MOF particles.

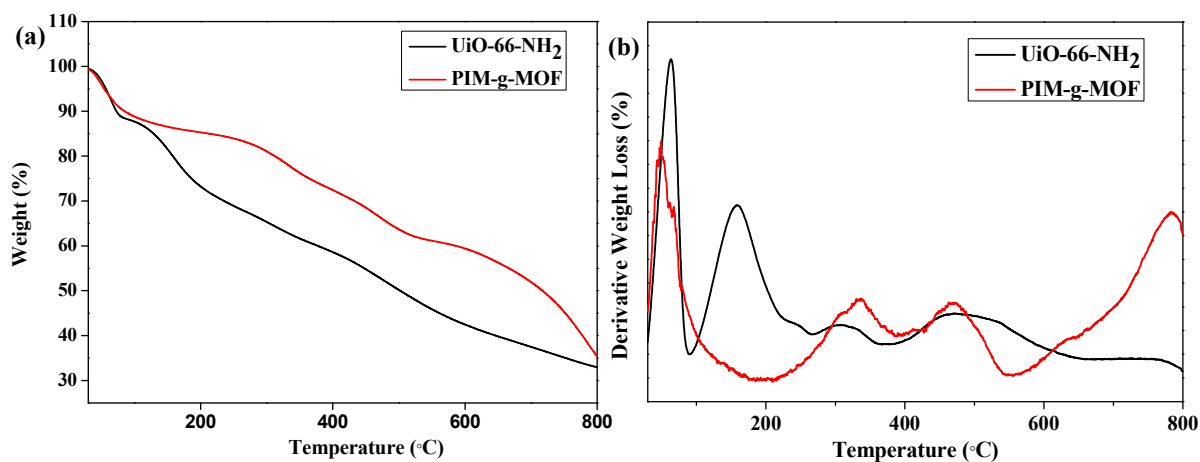

**Figure S3.** (a) TGA and (b) DTG curves for UiO-66-NH<sub>2</sub> and PIM-g-MOF particles.

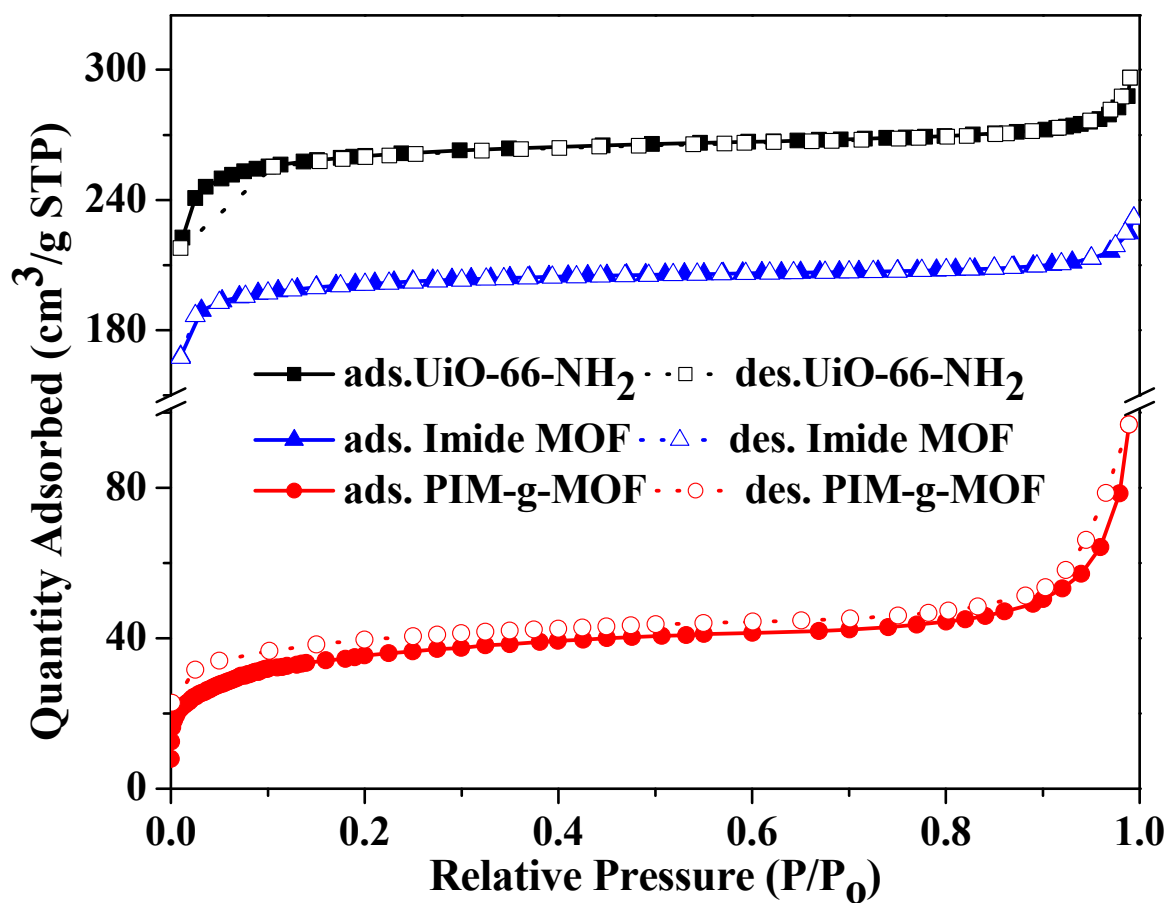

**Figure S4.** Nitrogen adsorption (solid line-filled symbol)/desorption (dotted line-empty symbol) isotherm BET plots at 77 K for UiO-66-NH<sub>2</sub>, imide MOF, and PIM-g-MOF.

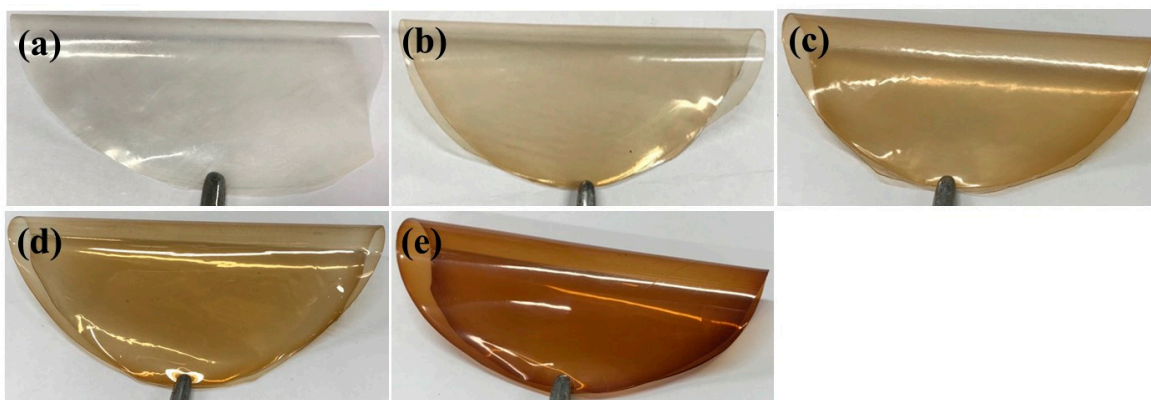

**Figure S5.** Photographs of (a) pristine Pebax membrane and MMMs with (b) 0.5 wt%, (c) 1 wt%, (d) 3 wt% and (e) 5 wt% of PIM-g-MOF loading.

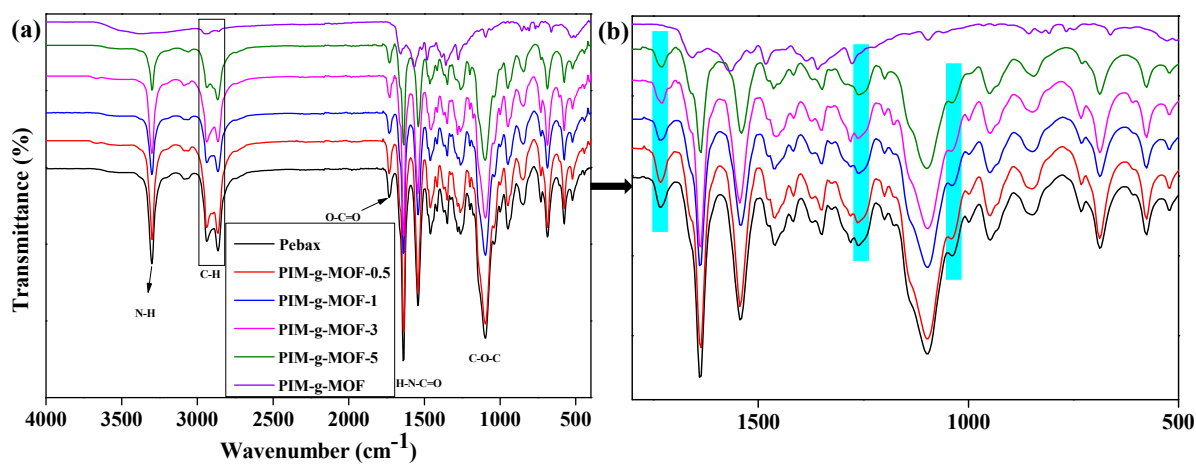

**Figure S6.** (a) ATR-FTIR spectra of the pristine Pebax membrane, MMMs with various MOF (PIM-g-MOF) loading, and (b) the same spectra from 1800 to 500  $\text{cm}^{-1}$ .

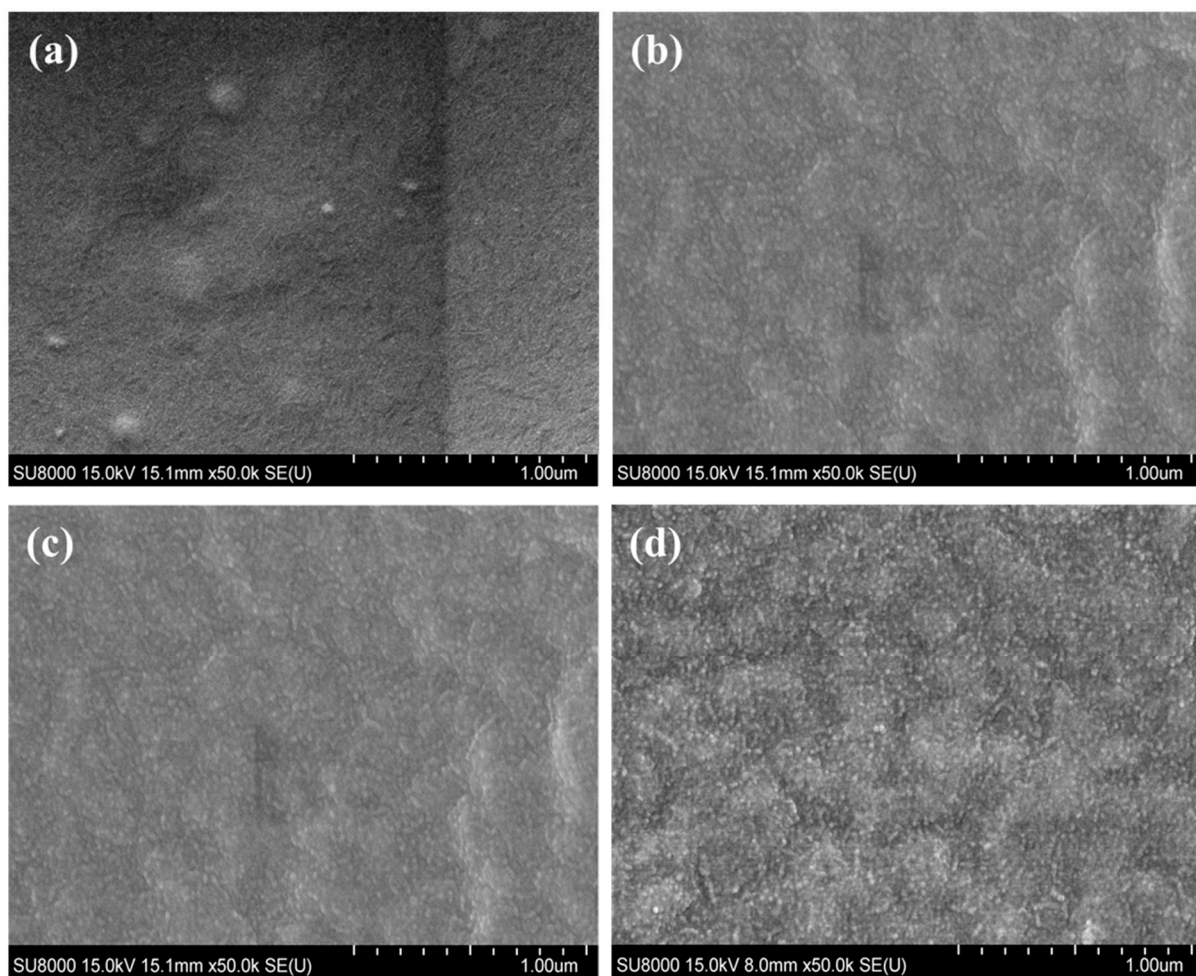

**Figure S7.** Cross-sectional SEM images of various loadings of fillers: (a) PIM-g-MOF-0.5, (b) PIM-g-MOF-1, (c) PIM-g-MOF-3, and (d) PIM-g-MOF-5.

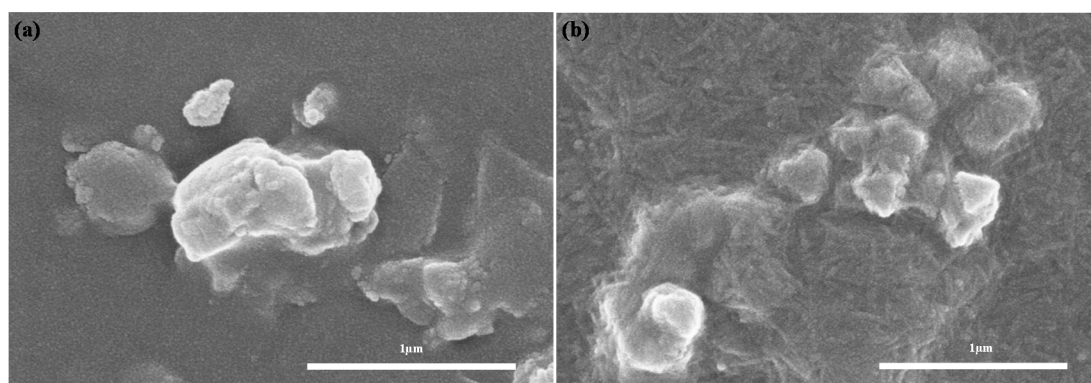

**Figure S8.** SEM images of (a) UiO-66-NH<sub>2</sub>-1 and (b) UiO-66-NH<sub>2</sub>-3.



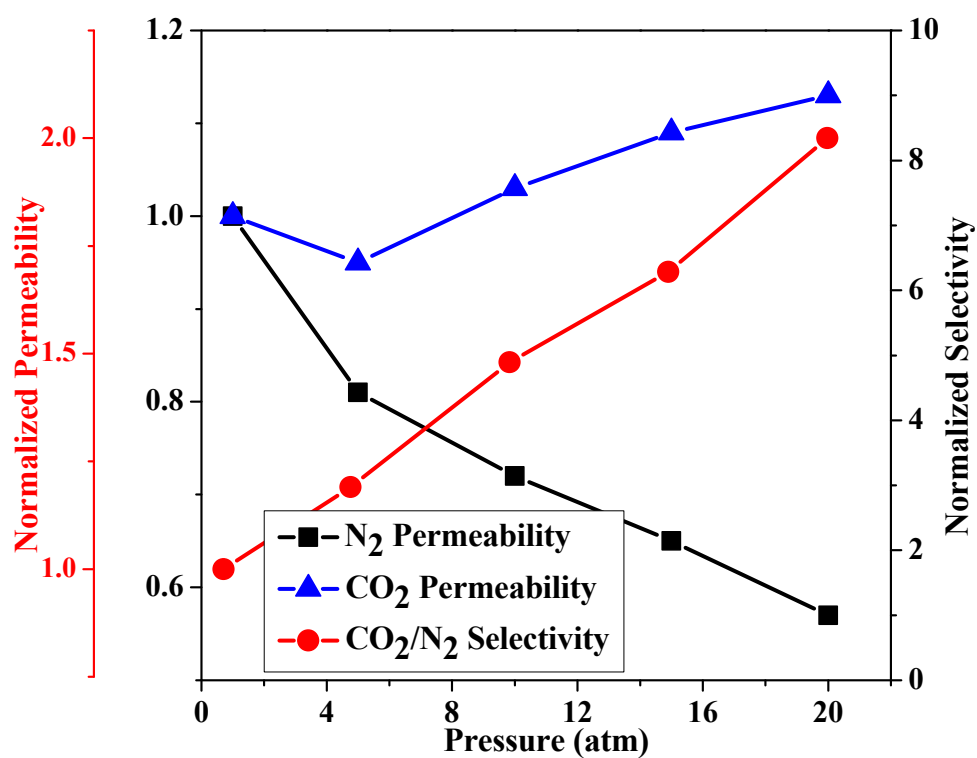

**Figure S9.** Pressure effect on the CO<sub>2</sub>, N<sub>2</sub> permeability and CO<sub>2</sub>/N<sub>2</sub> selectivities. Permeability is normalized by the initial permeability with feed pressure at 2atm.

**Table S1.** Thermal properties of the MMMs obtained from TGA analysis

| Membrane      | T <sub>d</sub> (°C) | T <sub>max</sub> (°C) |
|---------------|---------------------|-----------------------|
| Pebax         | 350                 | 416                   |
| PIM-g-MOF-0.5 | 348                 | 418                   |
| PIM-g-MOF-1   | 346                 | 417                   |
| PIM-g-MOF-3   | 341                 | 414                   |
| PIM-g-MOF-5   | 338                 | 413                   |

T<sub>d</sub>: onset of decomposition temperature; T<sub>max</sub>: maximum weight loss temperature.

**Table S2.** Mechanical properties of pristine Pebax and MMMs at various loadings of PIM-g-MOF.

| Membrane    | Elongation at Break (%) | Tensile Strength (MPa) | Young's Modulus (GPa) |
|-------------|-------------------------|------------------------|-----------------------|
| Pebax       | 684.4                   | 11.2                   | 0.80                  |
| PIM-g-MOF-1 | 596.5                   | 16.08                  | 1.61                  |
| PIM-g-MOF-3 | 504.4                   | 16.1                   | 2.01                  |
| PIM-g-MOF-5 | 420.9                   | 15.9                   | 1.93                  |

**Table S3.** Gas separation results of the MMMs

| Membrane Code | <sup>a</sup> Permeability, Barrer |                |                 | Selectivity, $\alpha$           |                                  |
|---------------|-----------------------------------|----------------|-----------------|---------------------------------|----------------------------------|
|               | CO <sub>2</sub>                   | N <sub>2</sub> | CH <sub>4</sub> | CO <sub>2</sub> /N <sub>2</sub> | CO <sub>2</sub> /CH <sub>4</sub> |
| Pebax         | 141.4                             | 4.0            | 12.1            | 35.3                            | 11.7                             |
| PIM-g-MOF-0.5 | 234                               | 4.2            | 14.4            | 55.7                            | 16.3                             |
| PIM-g-MOF-1   | 247                               | 4.4            | 14.5            | 56.1                            | 17                               |
| PIM-g-MOF-3   | 196.5                             | 3.7            | 11.5            | 53.1                            | 17.1                             |
| PIM-g-MOF-5   | 114.3                             | 2.3            | 6.7             | 50                              | 16.9                             |

<sup>a</sup> Permeability in Barrer, where 1 Barrer = 10<sup>-10</sup>[cm<sup>3</sup> (STP) cm]/(cm<sup>2</sup> s cm Hg)

**Table S4.** Gas separation results of the pure MOF-containing mixed matrix membranes

| Membrane Code             | <sup>a</sup> Permeability, Barrer |                |                 | Selectivity, $\alpha$           |                                  |
|---------------------------|-----------------------------------|----------------|-----------------|---------------------------------|----------------------------------|
|                           | CO <sub>2</sub>                   | N <sub>2</sub> | CH <sub>4</sub> | CO <sub>2</sub> /N <sub>2</sub> | CO <sub>2</sub> /CH <sub>4</sub> |
| UiO-66-NH <sub>2</sub> -1 | 150.2                             | 5.4            | 11.2            | 27.8                            | 13.4                             |
| UiO-66-NH <sub>2</sub> -3 | 268.3                             | 14.8           | 17.3            | 18.1                            | 15.5                             |

<sup>a</sup> Permeability in Barrer, where 1 Barrer =  $10^{-10} [\text{cm}^3 (\text{STP}) \text{ cm}] / (\text{cm}^2 \text{ s cm Hg})$
